# Supplementary material
Source: Royal Society of Chemistry journal article supplement (doi:10.1039/d5lc00968e)

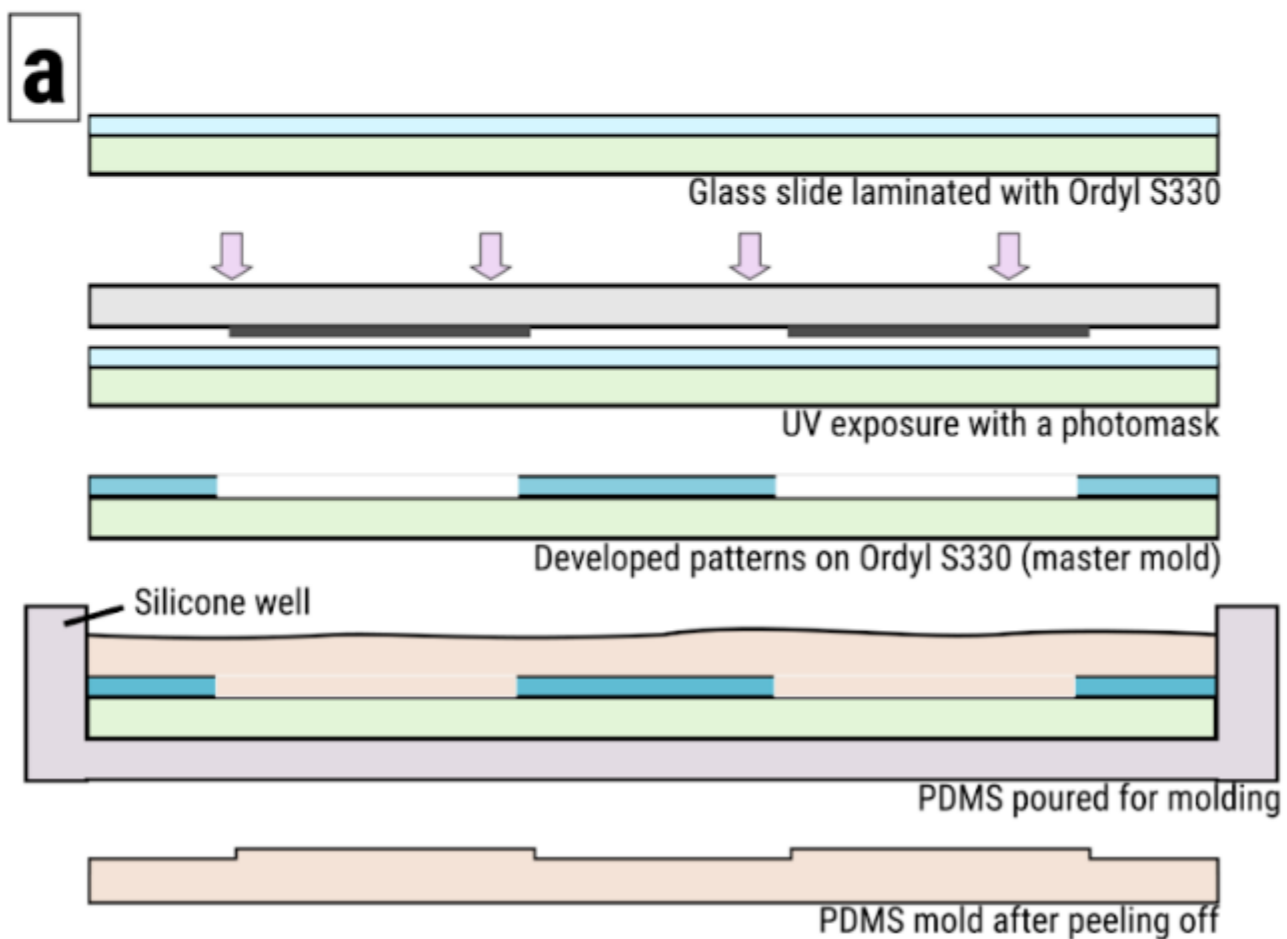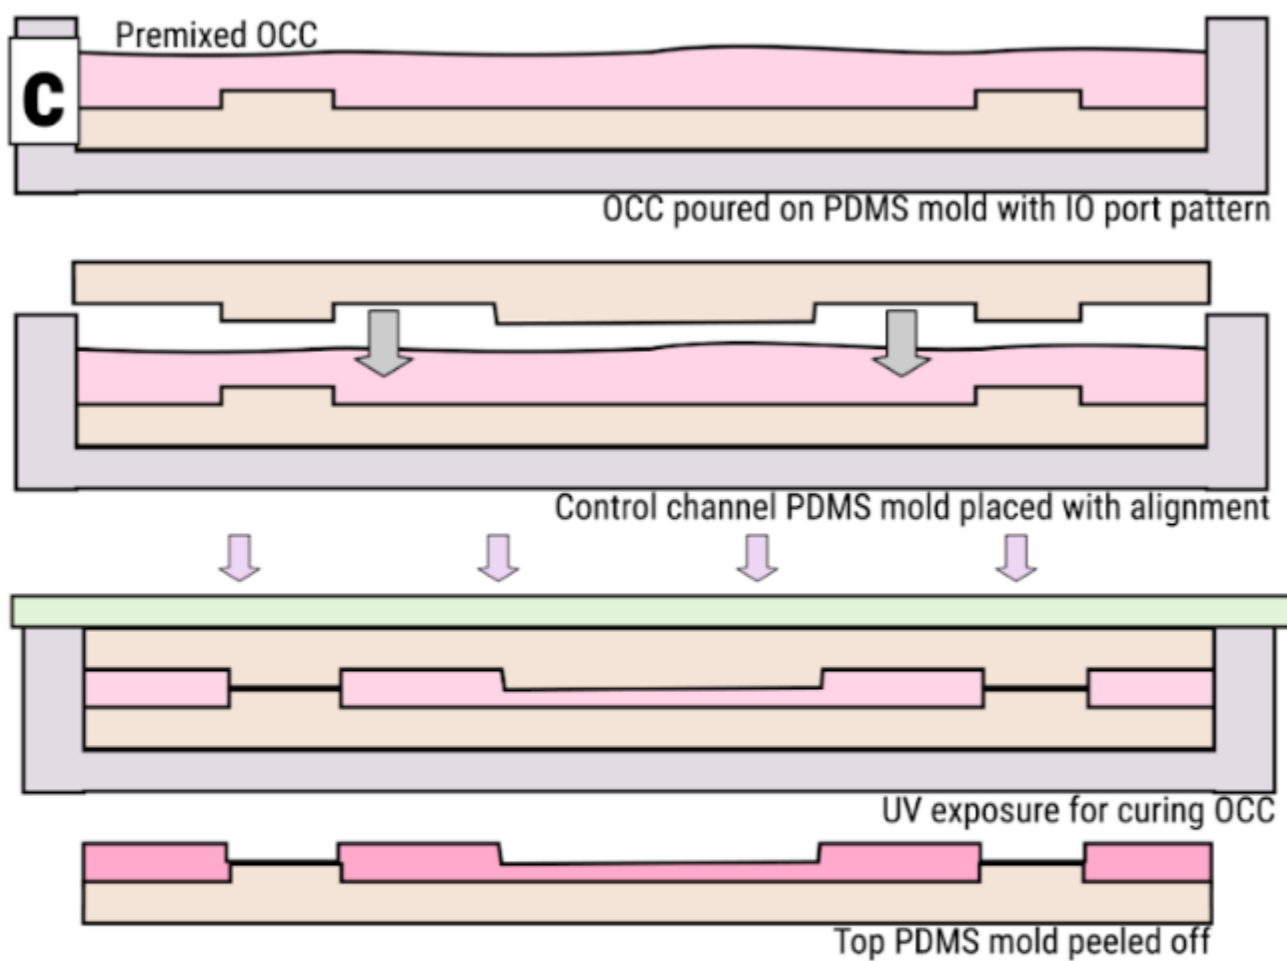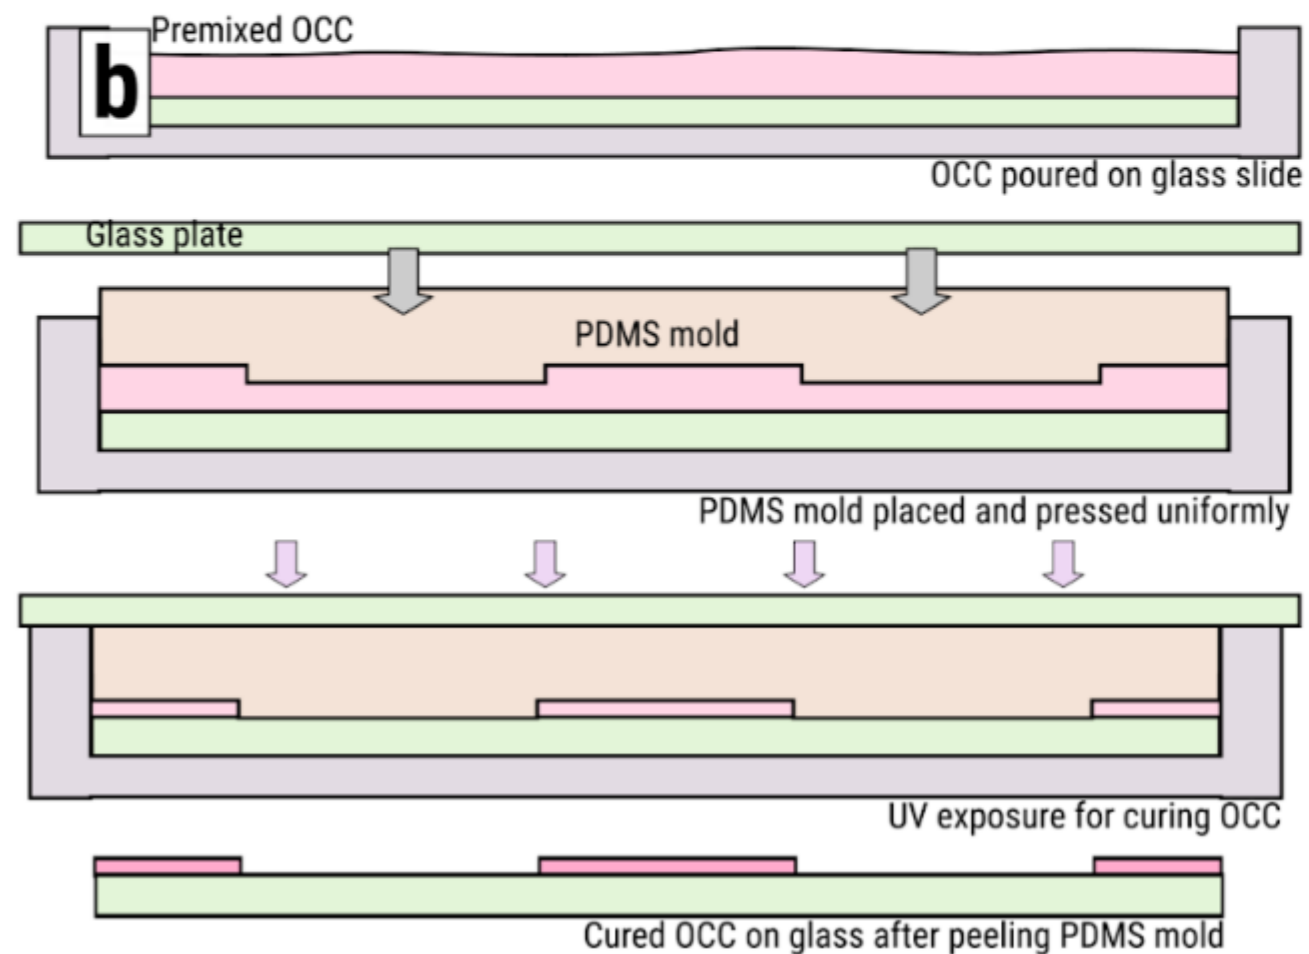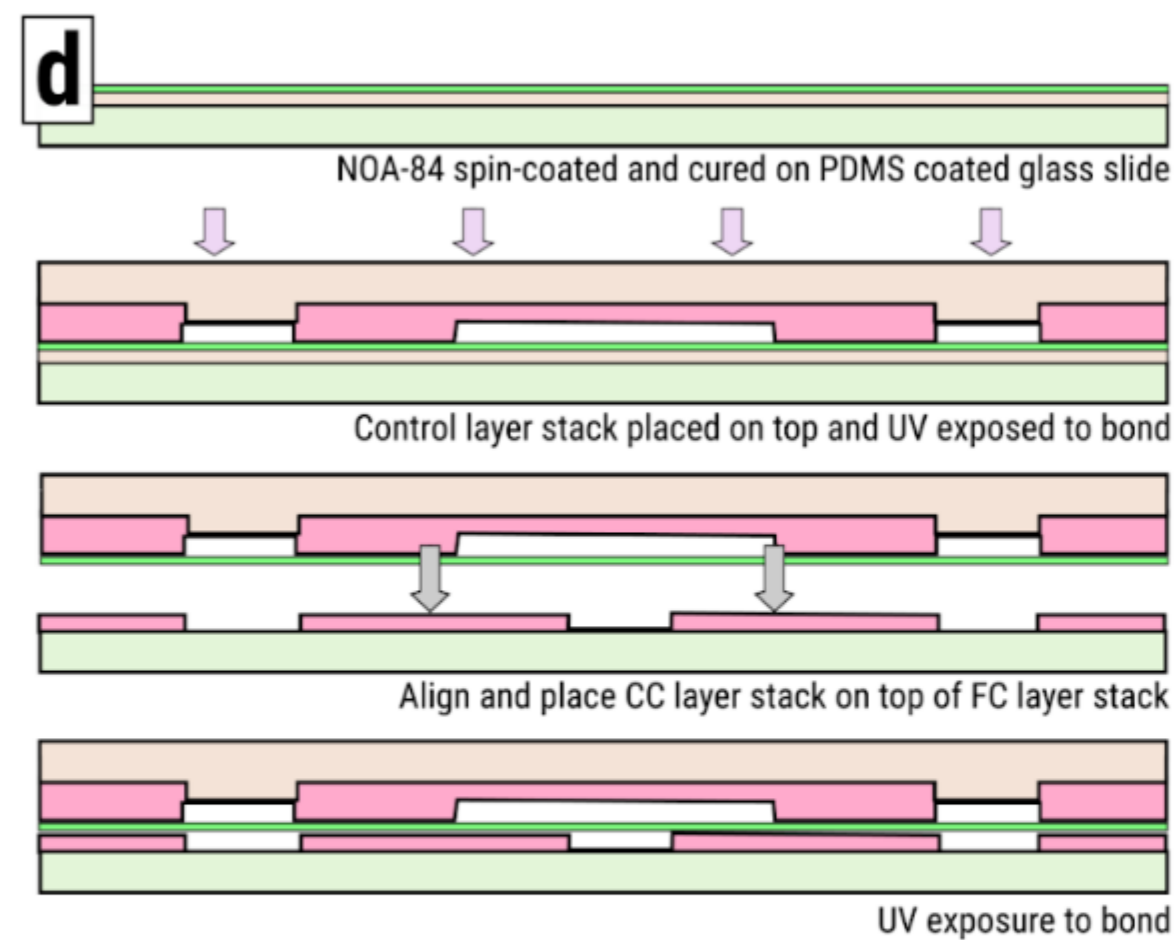

Supplement: d5lc00968e2.pdf [file d5lc00968e2.pdf]
